# Supplementary material for: Red-emitted AIEgens-based lateral flow immunoassay for the visual and quantitative detection of aflatoxin M1 in milk
Source: Research Square preprint supplement (doi:10.21203/rs.3.rs-7174022/v1), 2025-08-01

Supplementary Information

**Red-emitted AIEgens-based lateral flow immunoassay for the visual and quantitative detection of aflatoxin M1 in milk**

Wenbo Guo1, Qingyi Liu1, Junhua Yang1, Haijuan Zeng2, *, Juan Liu3, Lemei Zhu3, Dongxia Nie1, Zhihui Zhao1, Zheng Han1,*

1 Institute for Agro-food Standards and Testing Technology, Shanghai Key Laboratory of Protected Horticultural Technology, Shanghai Academy of Agricultural Sciences, Shanghai, China

2The Biotechnology Research Institute, Shanghai Academy of Agricultural Sciences, Key Laboratory of Agricultural Genetics and Breeding, Shanghai Professional Technology Service Platform of Agricultural Biosafety Evaluation and Testing, Shanghai, China

3 School of Public Health, Academician Workstation, Changsha Medical University, Changsha, China

* To whom correspondence should be addressed.

E-mail address: zenghaijuan@saas.sh.cn; hanzheng@saas.sh.cn.

**Contents**

1. UHPLC-MS/MS analysis

2. Fig. S1 Visual inspection by the FIT and FIC changes with various volume of AIEgens-mAb

3. Fig. S2 Images of the AIEgens-LFIA with AFM1 and other mycotoxins under 365 nm UV excitation

4. Table S1 Detection of AFM1 by AIEgens-LFIA at different storage temperatures

5. Table S2 Comparison of the analysis results for the AFM1 in spiked samples by AIEgens-LFIA and UPLC-MS/MS.

6. Graphical Abstract

**1.** **UHPLC-MS/MS analysis**

The detection results of the developed aggregation-induced emission luminogens based lateral flow immunochromatographic assay (AIEgens-LFIA) were further confirmed by UPLC-MS/MS analysis. Chromatographic separation was performed on an ACQUITY UPLC BEH C18 column (2.1×100 mm, 1.7 µm). The mobile phase was consisted of methanol (A) and 5 mmol L−1 ammonium acetate (B). A linear gradient elution program was set as follows: initial 10% A; 1 min, 10% A; 5 min, 90% A; 6 min, 90% A; 6.5 min, 10% A; 8 min, 10% A. The flow rate was 0.4 mL min−1. The injection volume was 3 µL, and the column temperature was 35 °C.

Electrospray ionization was used in positive electrospray ionization mode (ESI+) with the following parameters: interface voltages of capillary, 2.5 kV; desolvation temperature, 500 ℃; and source temperature, 150 ℃. The gas flow rates were 7.0 bar for nebulizing gas and 1000 L h−1 for desolvation gas, respectively. Multiple reaction monitoring (MRM) mode was used for the quantification and the precursor/product transitions (*m/z*) were 329.1/273.1 and 329.1/229.2.


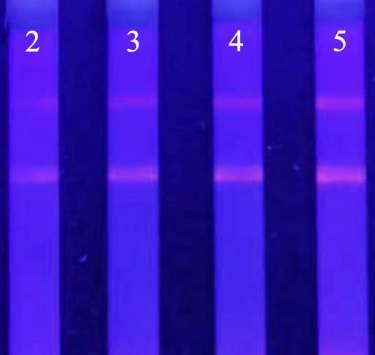


**Fig. S1** Visual inspection by the FIT and FIC changes with various volume of AIEgens-mAb.


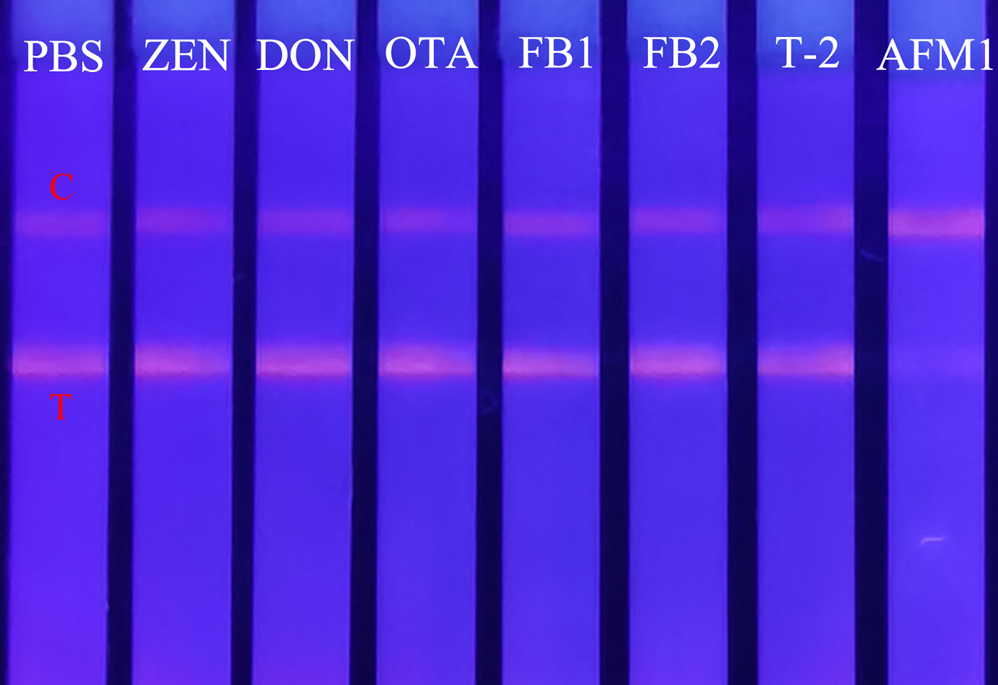


**Fig. S2** Images of the AIEgens-LFIA with AFM1 and other mycotoxins under 365 nm UV excitation.

**Table S1** Detection of AFM1 by AIEgens-LFIA at different storage temperatures.

| Periods of experimental (days) | 4 °C | | |  | 25 °C | | |
| --- | --- | --- | --- | --- | --- | --- | --- |
| FT a | FC | FT/FC | FT | FC | FT/FC |
| 0 | 6532 | 18624 | 0.35 |  | 8564 | 21546 | 0.40 |
| 1 | 7816 | 23017 | 0.34 |  | 6357 | 19654 | 0.32 |
| 3 | 6908 | 19354 | 0.36 |  | 7954 | 23516 | 0.34 |
| 7 | 5237 | 17008 | 0.31 |  | 5634 | 18645 | 0.30 |
| 15 | 8036 | 20347 | 0.39 |  | 6842 | 20019 | 0.34 |
| 30 | 7291 | 21368 | 0.34 |  | 8146 | 19658 | 0.41 |
| 60 | 5986 | 18624 | 0.32 |  | 6518 | 17359 | 0.38 |
| 90 | 7546 | 19534 | 0.39 |  | 8964 | 24618 | 0.36 |
| 180 | 8026 | 24038 | 0.33 |  | 9214 | 22835 | 0.40 |
| Mean ±SD b | 7042±970 | 20213±2246 | 0.35±0.03 |  | 7577±1273 | 20872±2406 | 0.36±0.04 |
| CV c（%） | 0.14 | 0.11 | 0.08 |  | 0.17 | 0.12 | 0.11 |

a FT represents the fluorescence intensity of the test line (AFM1, 0.5 ng/mL), and FC represents the fluorescence intensity of the control line (AFM1, 0.5 ng/mL). The FT/FC represents the detected results, and the storage temperatures are 4 °C and 25 °C.

b Standard deviation (SD) (n = 3).

c Coefficient of variation (CV).

**Table S2** Comparison of the analysis results for the AFM1 in spiked samples by AIEgens-LFIA and UPLC-MS/MS.

| Spiked levels  (ng/mL) | AIEgens-LFIA | |  | UPLC-MS/MS | |
| --- | --- | --- | --- | --- | --- |
| Mean  (ng/mL) | Recovery±SD  (%) | Mean  (ng/mL) | Recovery±SD  (%) |
| 0.1 | 0.098 | 97.53±13.73 |  | 0.107 | 107.37±14.52 |
| 0.5 | 0.512 | 102.47±8.44 |  | 0.482 | 96.47±8.44 |
| 1 | 1.041 | 104.13±6.87 |  | 1.021 | 102.07±5.19 |


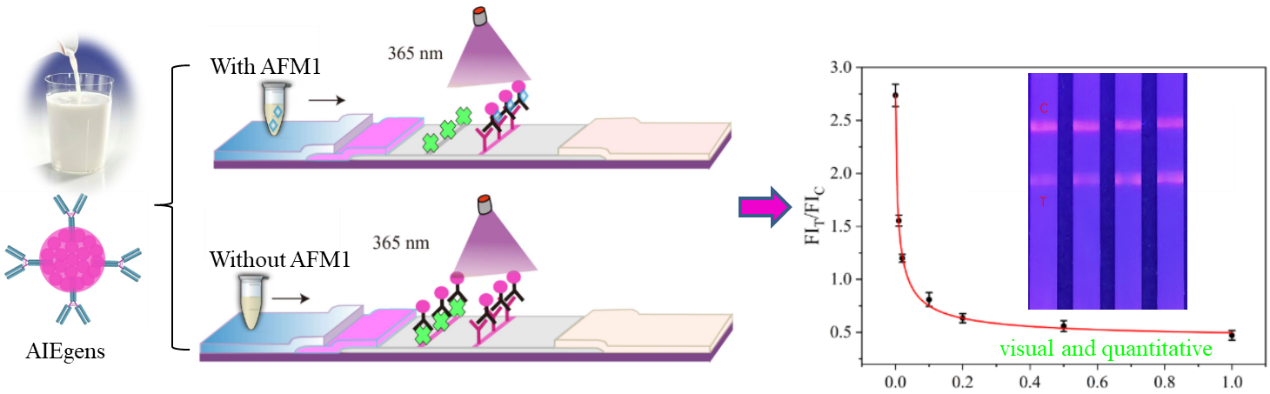

Supplement: Supplementary file 1 [file 3387cbd7f29696cef6b17305.docx]
